# Supplementary material for: Engineering highly selective CO2 electroreduction in Cu-based perovskites through A-site cation manipulation
Source: Royal Society of Chemistry journal article supplement (doi:10.1039/d4cp00845f), 2024-01-01
Supplement: d4cp00845f1.pdf [file d4cp00845f1.pdf]

## Supporting information

### Engineering Highly Selective CO<sub>2</sub> Electroreduction in Cu-based Perovskites through A-site Cation Manipulation

*Shuaibing Yang<sup>a, b</sup>, Xiao-Min Chen<sup>a, b</sup>, Tao Shao<sup>b</sup>, Zongnan Wei<sup>b</sup>, Zhe-ning Chen<sup>b, c</sup>, Rong Cao<sup>b, c</sup>,  
and Minna Cao<sup>\*b, c</sup>*

<sup>a</sup> College of Chemistry, Fuzhou University, Fuzhou, 350108, P.R. China

<sup>b</sup> State Key Laboratory of Structural Chemistry, Fujian Institute of Research on the Structure of Matter, Chinese Academy of Sciences, Fuzhou 350002, P.R. China

<sup>c</sup> University of Chinese Academy of Sciences, Beijing 100049, P.R. China

## Experimental details

### Chemicals.

Lanthanum (III) nitrate hexahydrate ( $\text{La}(\text{NO}_3)_3 \cdot 6\text{H}_2\text{O}$ ), Cupric nitrate hydrate ( $\text{Cu}(\text{NO}_3)_2 \cdot 3\text{H}_2\text{O}$ ), Cerium (III) nitrate hexahydrate ( $\text{Ce}(\text{NO}_3)_3 \cdot 6\text{H}_2\text{O}$ ) and Aqueous ammonia ( $\text{NH}_3 \cdot \text{H}_2\text{O}$ ) were purchased from Sinopharm Chemical Reagent Co., Ltd (China). Citric acid was purchased from Alfa. Strontium carbonate ( $\text{SrCO}_3$ ) was purchased from Aldrich. All solutions were prepared with ultrapure water with a resistivity of 18.2 M $\Omega$  cm. All reagents were used in their commercially available form without further purification.

### Characterization.

X-ray diffraction (PXRD) patterns were collected using a Rigaku Miniflex600 diffractometer equipped with Cu K $\alpha$  radiation ( $\lambda = 1.5406 \text{ \AA}$ ). Scanning Electron Microscope (SEM) images were obtained using a JSM6700-F FESEM. Transmission electron microscope (TEM), high-resolution transmission electron microscope (HR-TEM), high-angle annular dark-field scanning TEM (HAADF-STEM), and energy dispersive X-ray spectroscopy analysis (EDS) analysis were recorded on a field emission transmission electron microscope (FEI Tecnai F20, 200 kV). Inductively coupled plasma-atomic emission spectroscopy (ICP-AES) measurements were performed on an Ultima 2 analyzer (Jobin Yvon). For the faradaic efficiency analysis, gas products were detected by gas chromatography (Agilent 7820A) equipped with FID and TCD, and liquid products were characterized by  $^1\text{H}$  NMR on Bruker AVANCE AV III 400. At room temperature, the electrochemical performance measurements were conducted on a CHI1140C electrochemical workstation. The composition and electronic structures of catalysts were analyzed by an ESCALAB 250Xi X-ray photoelectron spectrometer (Thermo Fisher) using an Al K $\alpha$  source (15 kV, 10 mA). Using an Al K $\alpha$  as the excitation source, with the pressure inside the chamber maintained below  $5.0 \times 10^{-8}$  Pa, the spectra were collected at a pass energy of 40.0 eV. For the accurate comparison of all valence band XPS spectra, the secondary electron background (Smart-type, which is fitted by using Avantage software) was subtracted from the measured spectra. In situ attenuated total reflectance Fourier transform infrared spectroscopy (ATR-FTIR) was obtained by a Nicolet 6700 (Thermo Fisher) equipped with a liquid nitrogen cooled MCT detector. Experiments were in the mixture of 0.1 M  $\text{KHCO}_3$  and 0.1 M KCl using a homemade ATR-FTIR setup. EIS was measured in  $\text{CO}_2$ -saturated 0.1 M  $\text{KHCO}_3$  + 0.1 M KCl at -1.4V vs. RHE from 100K Hz to 0.1 Hz.

## Supplementary Figures

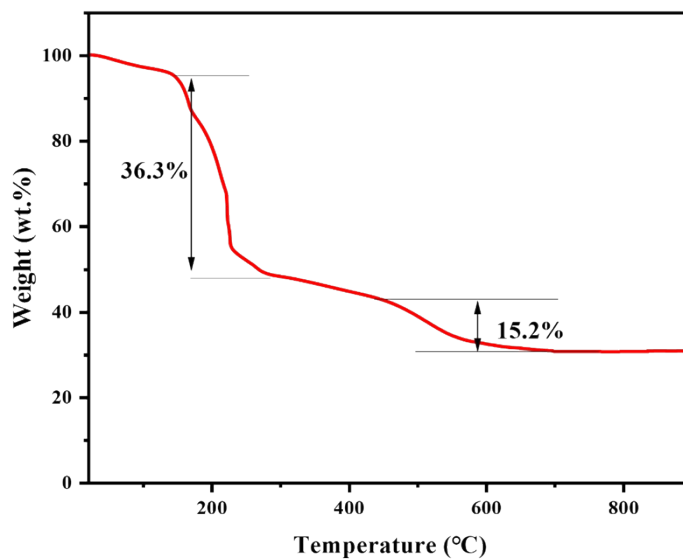

**Figure S1.** TG curve of  $\text{La}_2\text{CuO}_4$  precursor.

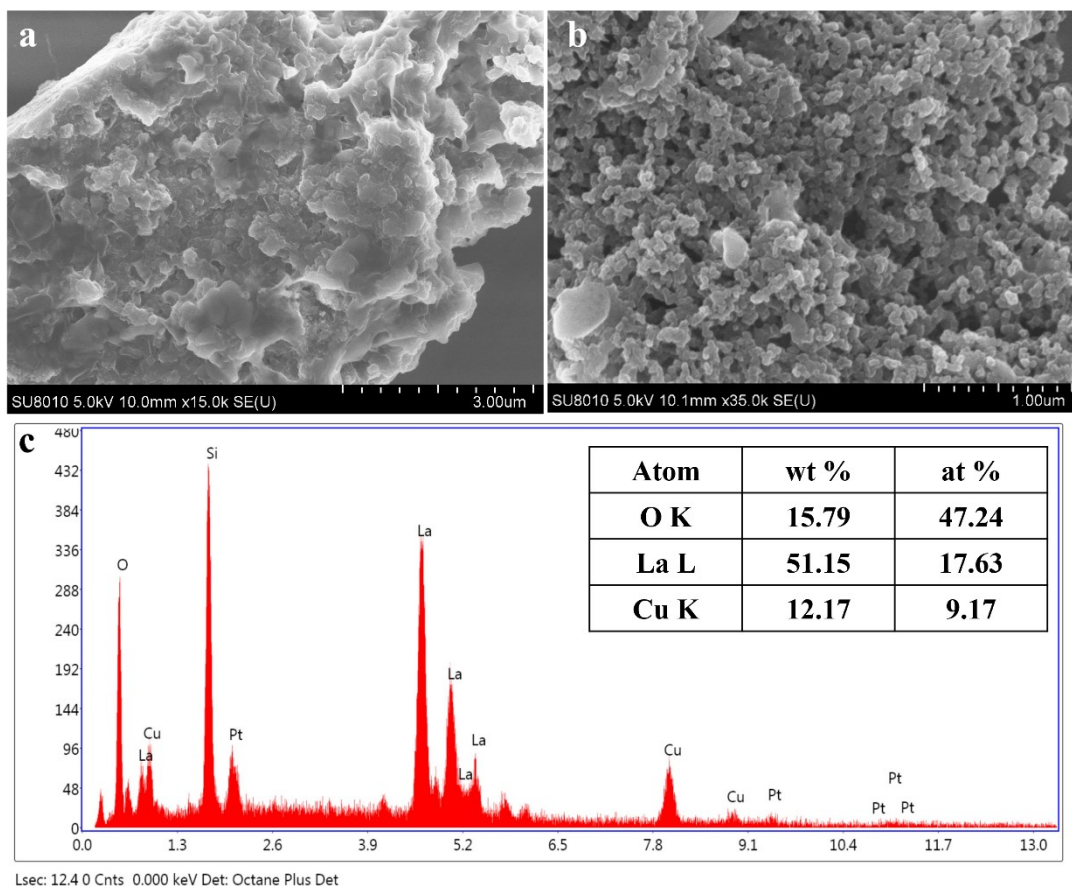

**Figure S2.** SEM images (scale bar: 3  $\mu\text{m}$  a) and 1  $\mu\text{m}$  b) and EDS pattern of LCO.

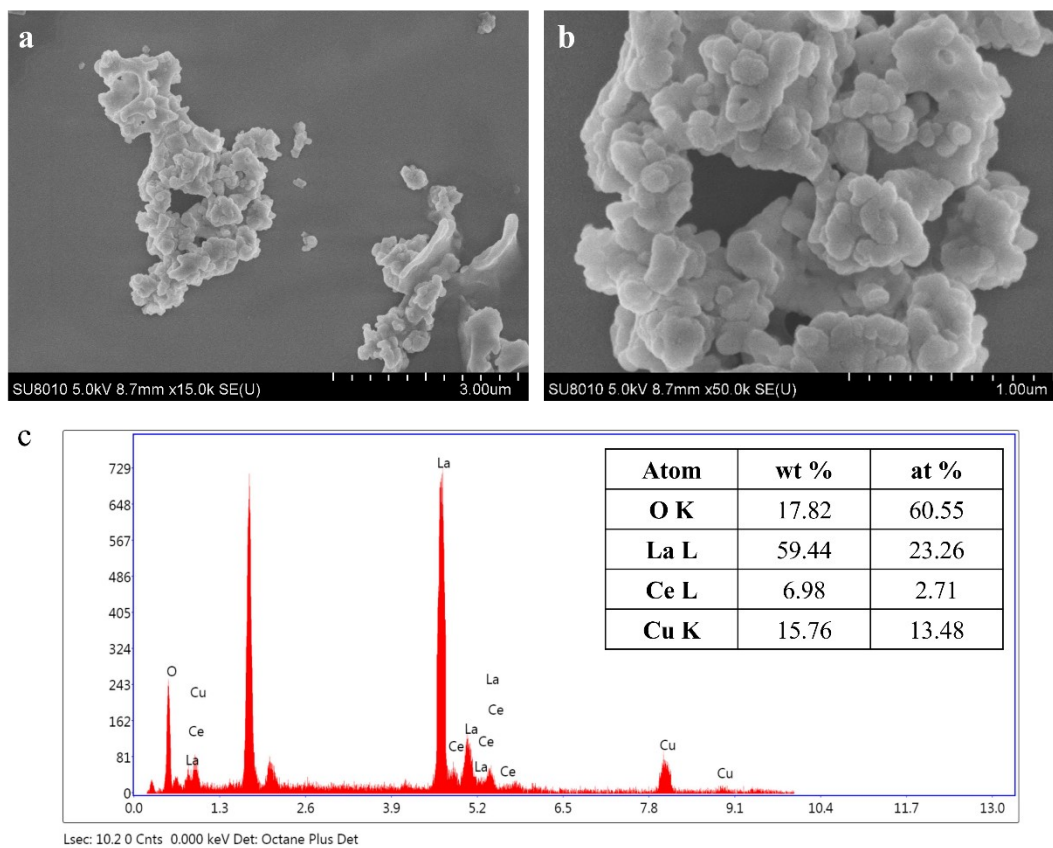

**Figure S3.** SEM images (scale bar: 3µm a) and 1µm b) and EDS pattern of LCCO.

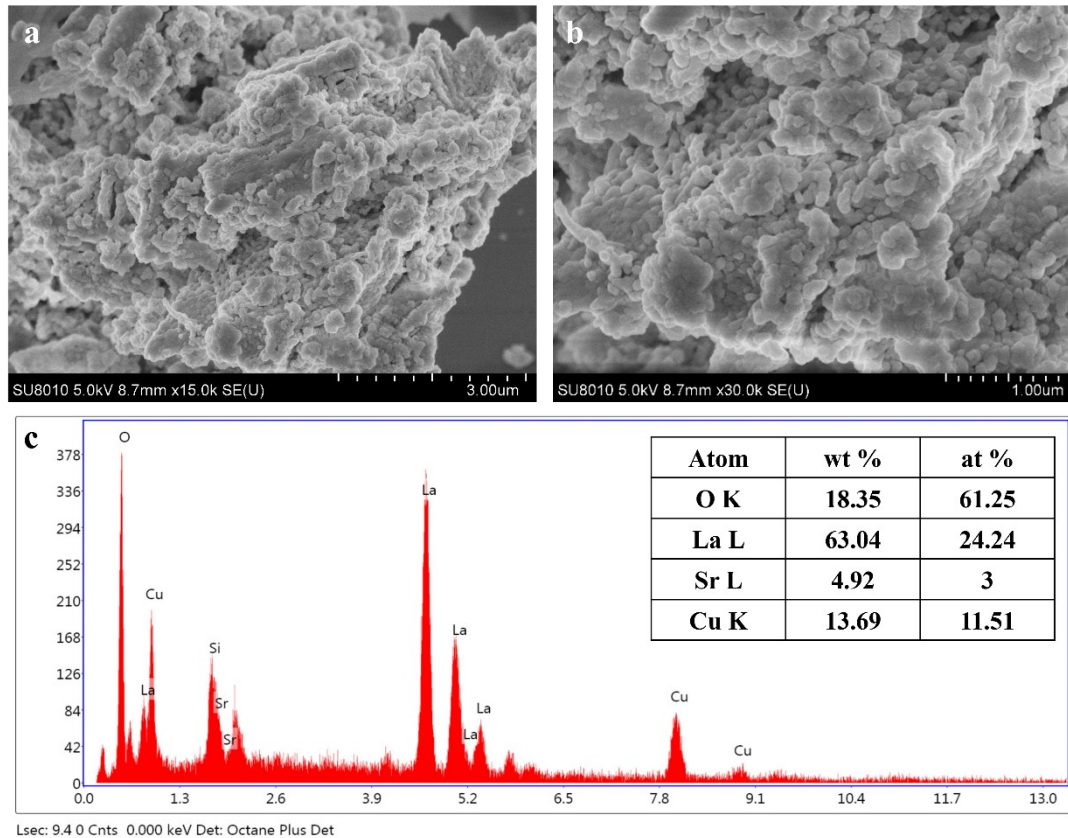

**Figure S4.** SEM images (scale bar: 3µm a) and 1µm b) and EDS pattern of LSCO.

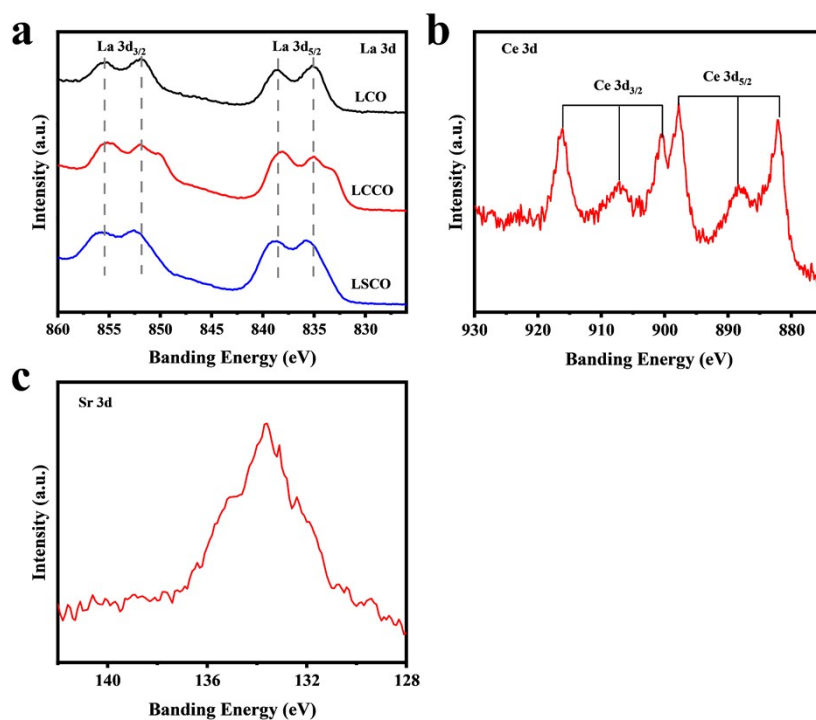

**Figure S5.** (a) La 3d XPS spectra of LCO, LCCO, and LSCO. (b) Ce 3d XPS spectra of LCCO. (c) Sr 3d XPS spectra of LSCO.

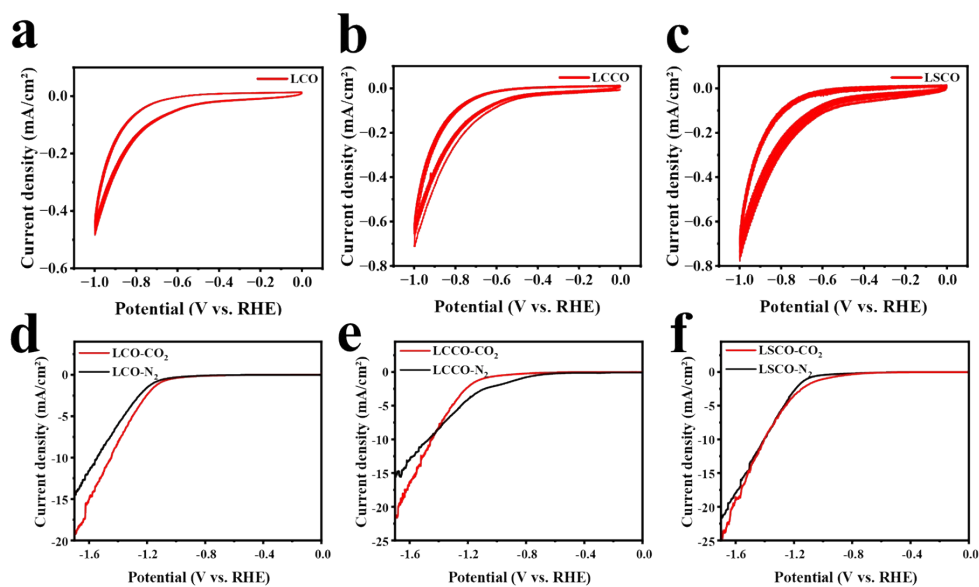

**Figure S6.** Cyclic voltammograms of (a) LCO, (b) LCCO, and (c) LSCO in 0.1M KHCO<sub>3</sub> + 0.1M KCl electrolyte. Linear sweep voltammograms of (d) LCO, (e) LCCO, and (f) LSCO in saturated CO<sub>2</sub> electrolyte and saturated N<sub>2</sub> electrolyte.

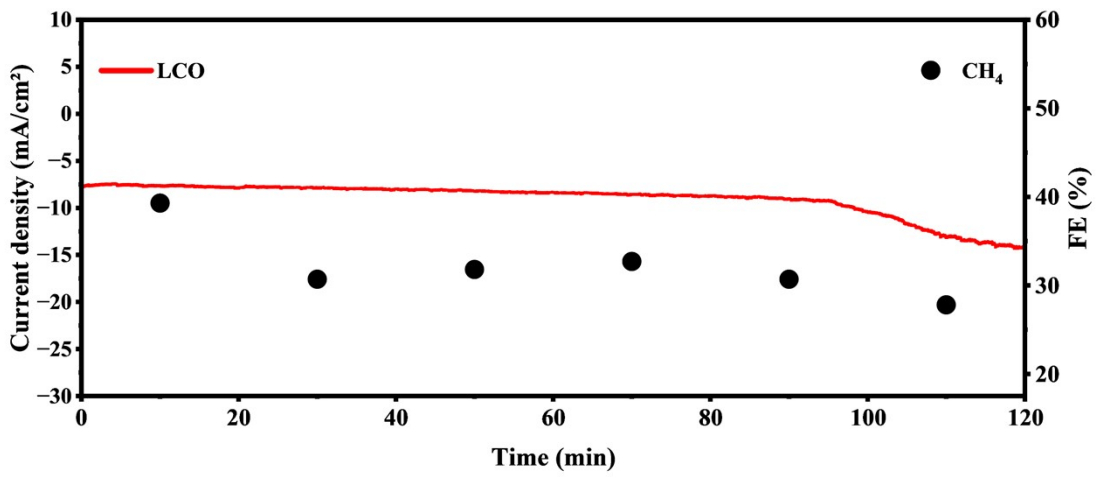

Figure S7. Stability test for CH<sub>4</sub> production over LCO.

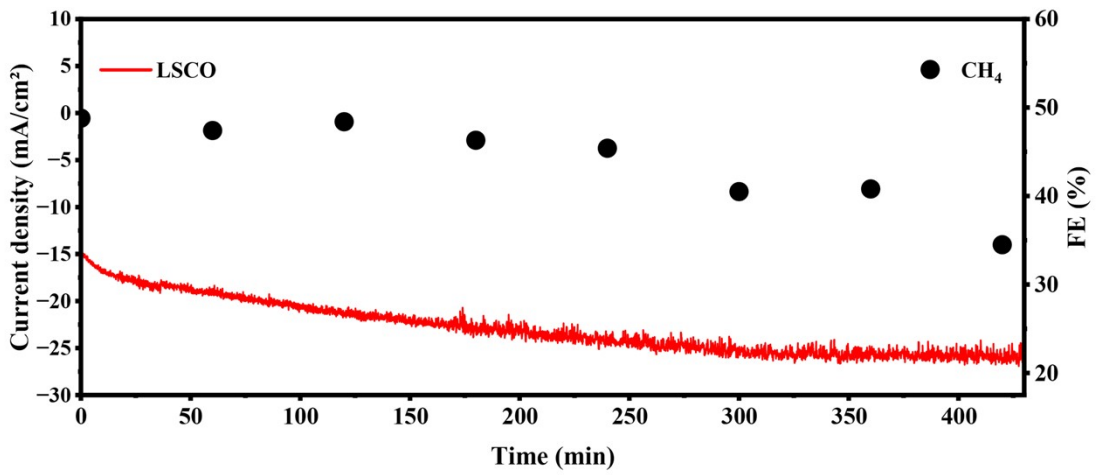

Figure S8. Stability test for CH<sub>4</sub> production over LSCO.

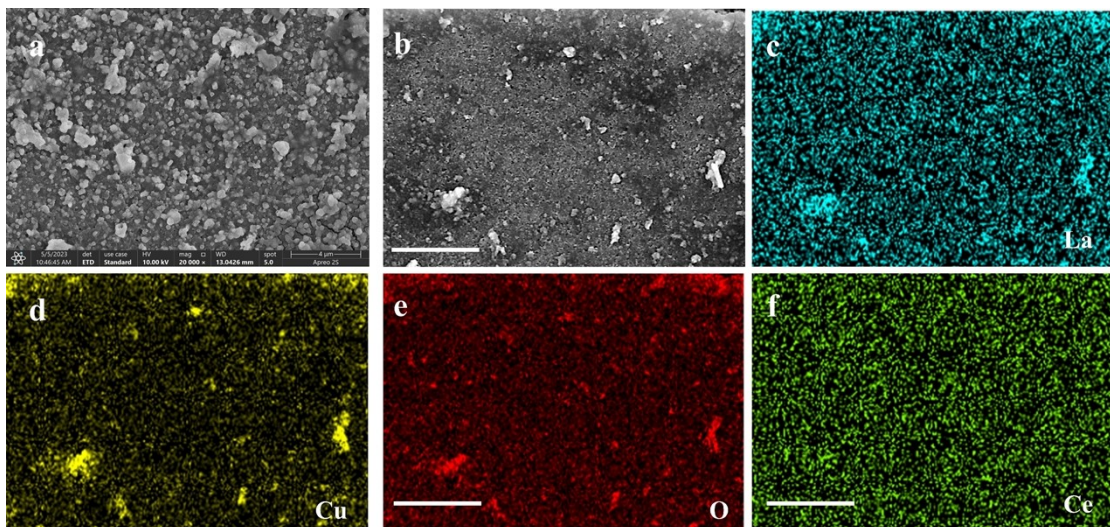

Figure S9. SEM (a), (b), and SEM-EDS elemental mappings of LCCO after durability test (c ~ f)

(Scale bar: 10 $\mu$ m).

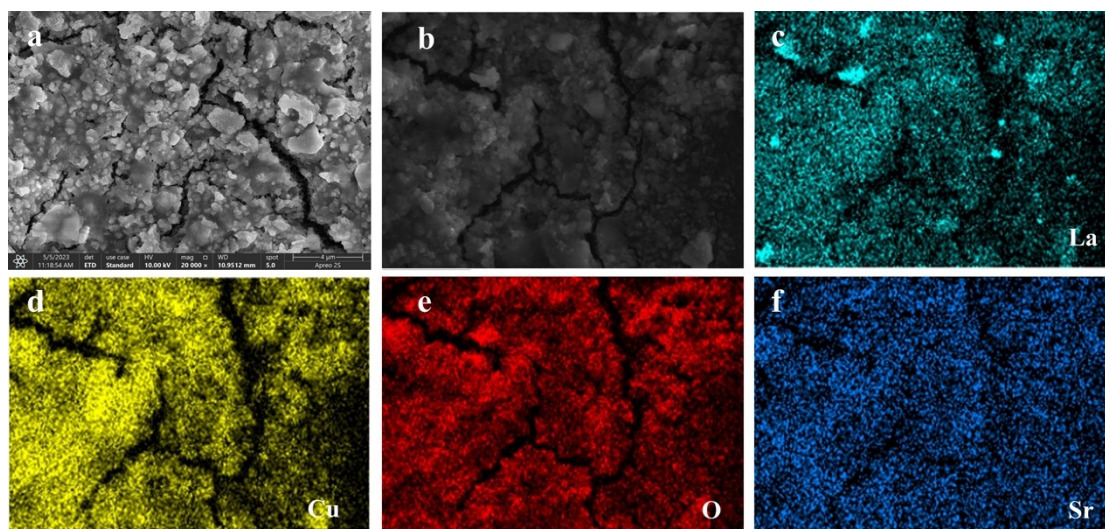

**Figure S10.** SEM (a), (b), and SEM-EDS elemental mappings of LSCO after durability test (c ~ f) (Scale bar: 10 $\mu$ m).

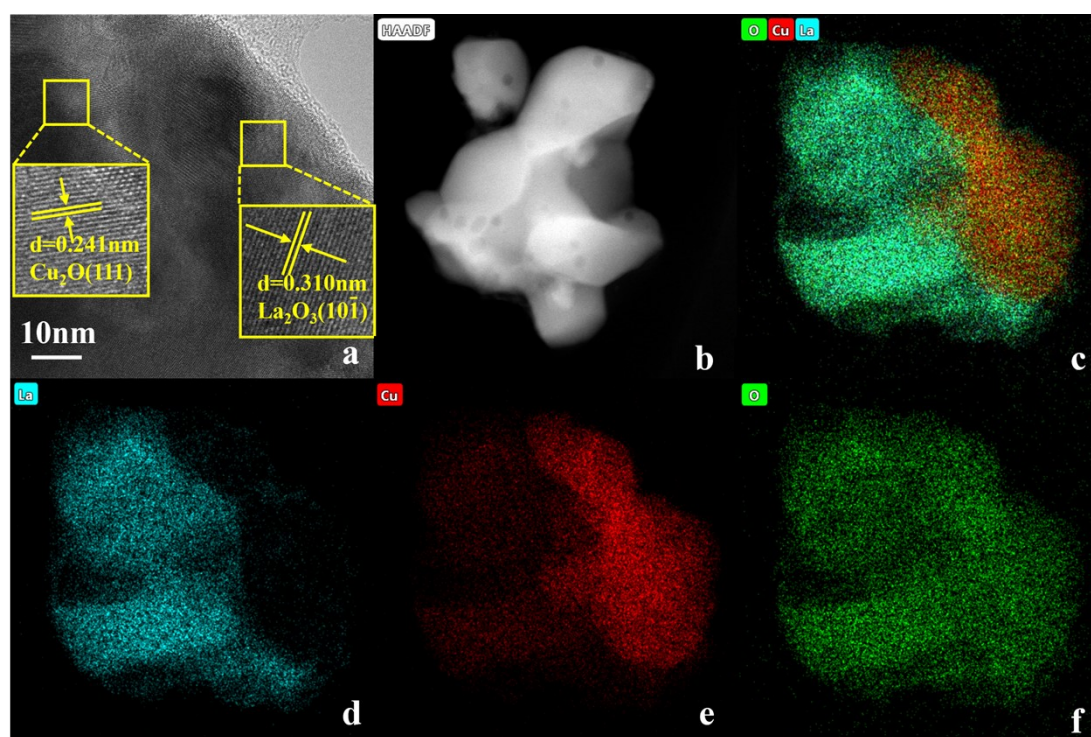

**Figure S11.** TEM image (a), HAADF-STEM image (b), and the EDX mappings (c ~ f) of LCO after the durability test.

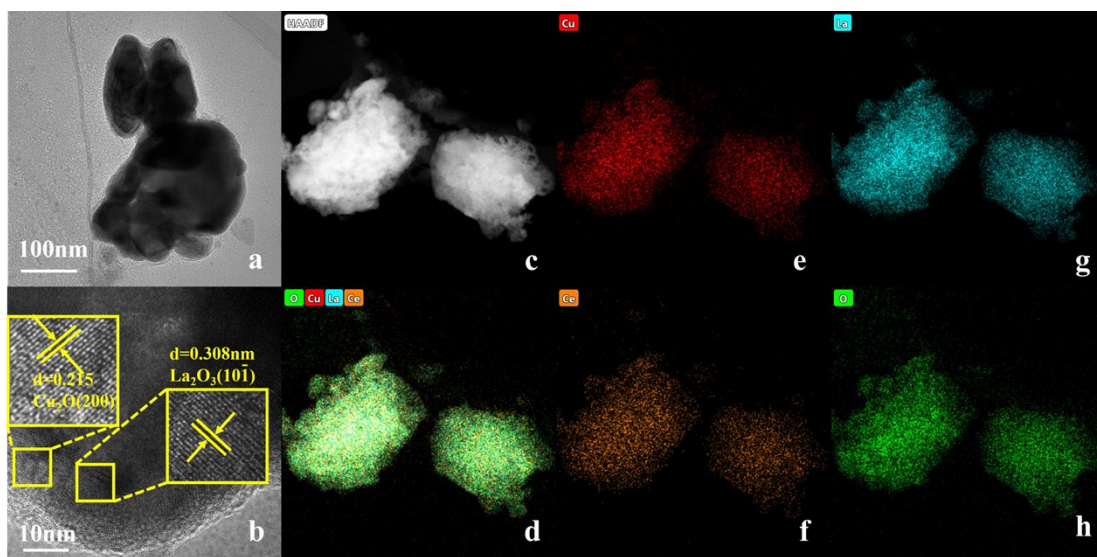

**Figure S12.** TEM image (a), (b), HAADF-STEM image (c), and the EDX mappings (d ~ h) of LCCO after the durability test.

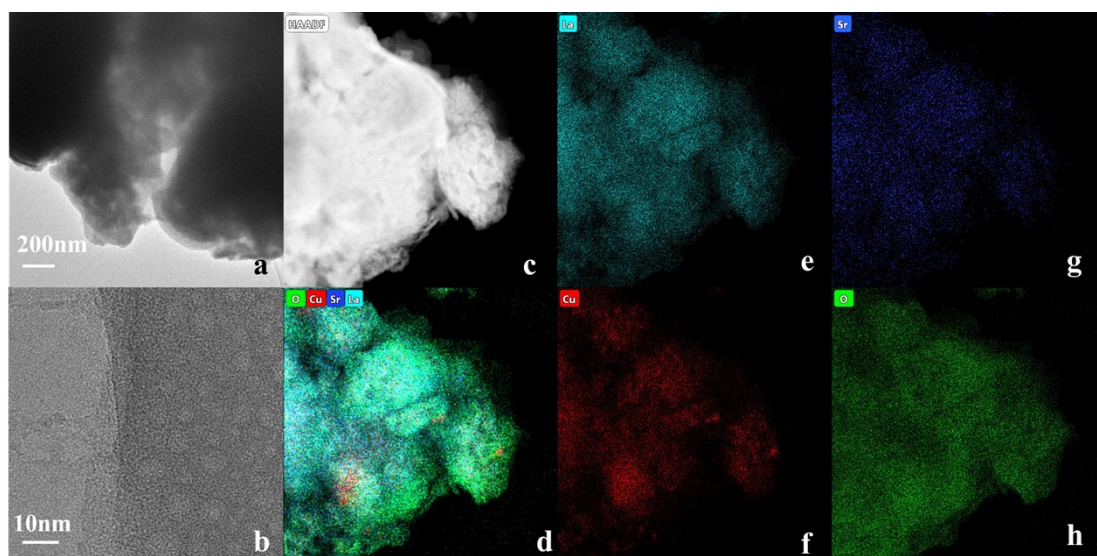

**Figure S13.** TEM image (a), (b), HAADF-STEM image (c), and the EDX mappings (d ~ h) of LSCO after the durability test.



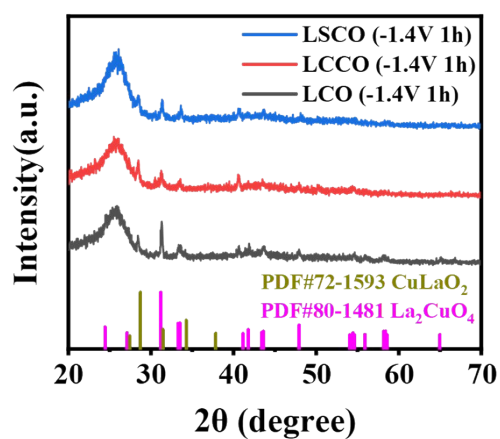

**Figure S14.** XRD patterns of LCO, LCCO, and LSCO samples after 1h test at -1.4V vs. RHE

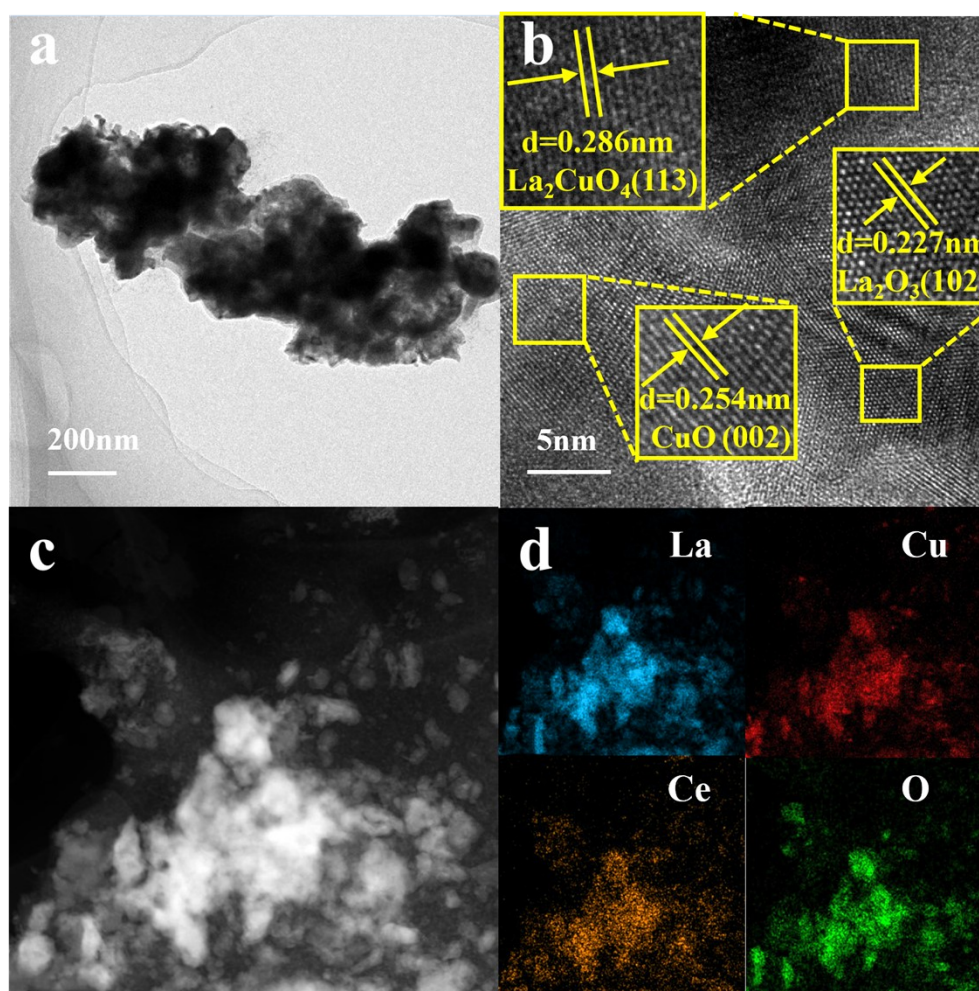

**Figure S15.** (a) TEM image, (b) HR-TEM, (c) HAADF-STEM image and (d) the EDX mapping of LCCO after 1h test at -1.4V vs. RHE.

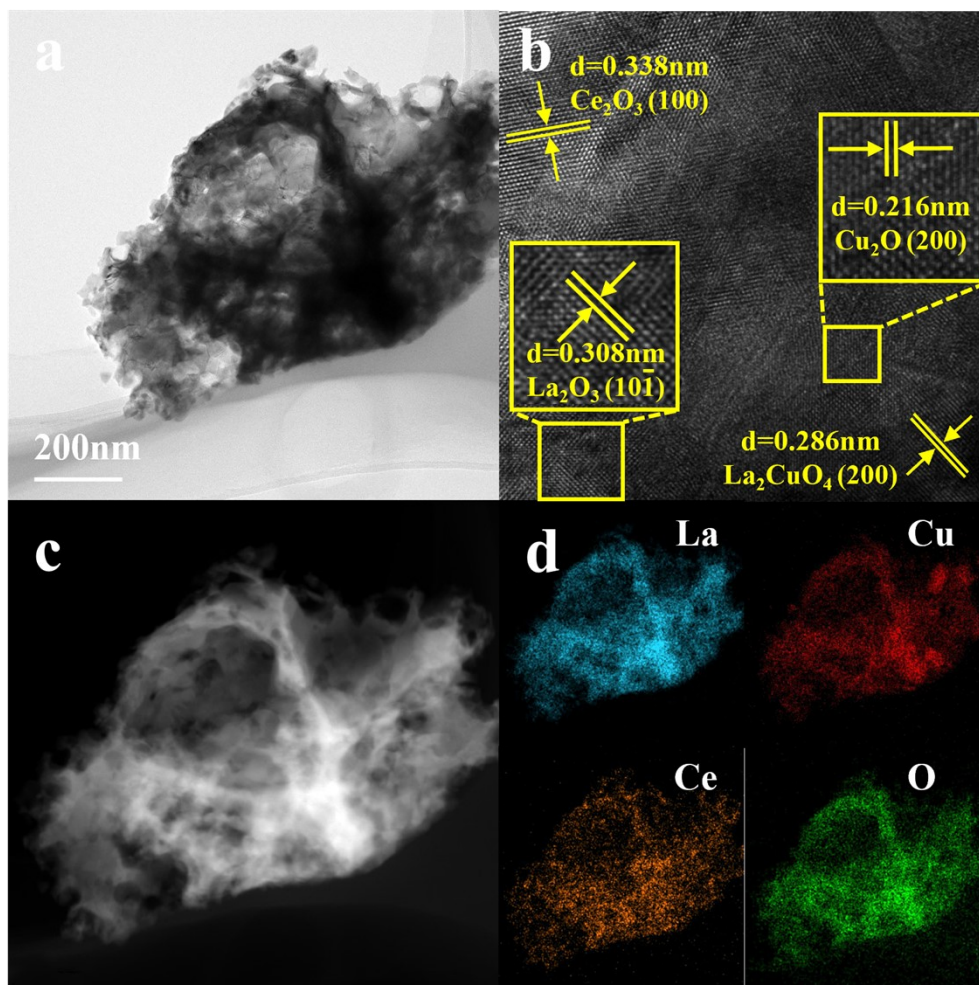

**Figure S16.** (a) TEM image, (b) HR-TEM, (c) HAADF-STEM image and (d) the EDX mapping of LCCO after 2h test at -1.4V vs. RHE.

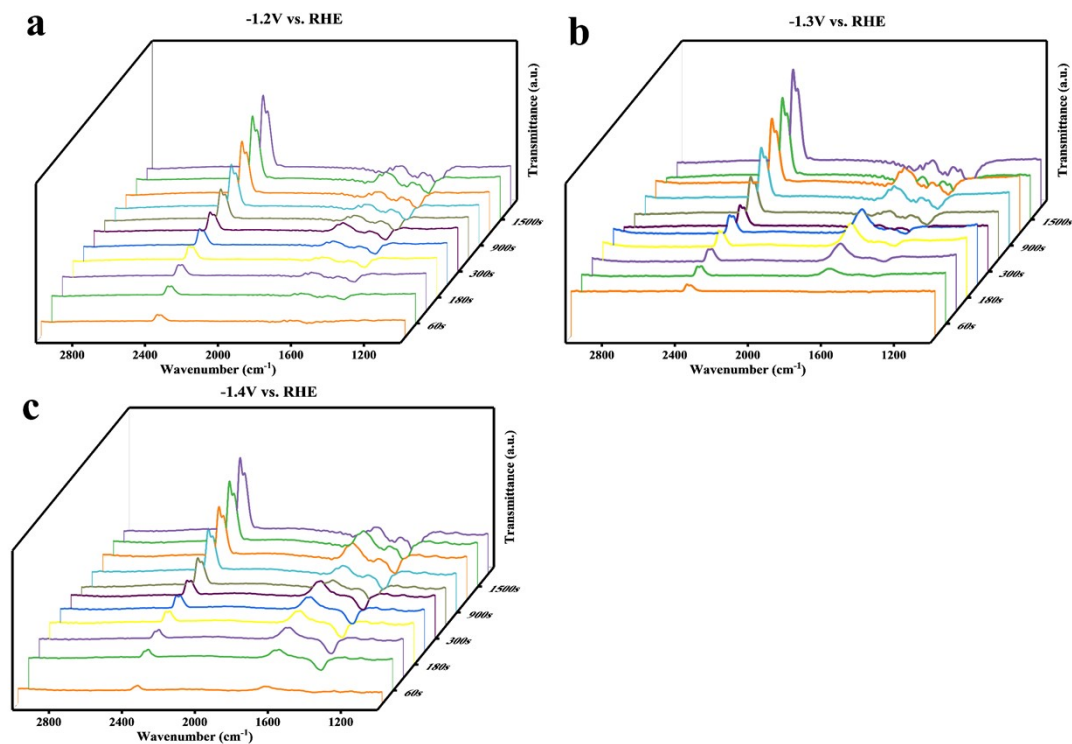

**Figure S17.** FTIR spectra of LCCO at different voltages and constant voltages at different times. (a) -1.2V vs. RHE, (b) -1.3V vs. RHE, (c) -1.4V vs. RHE.

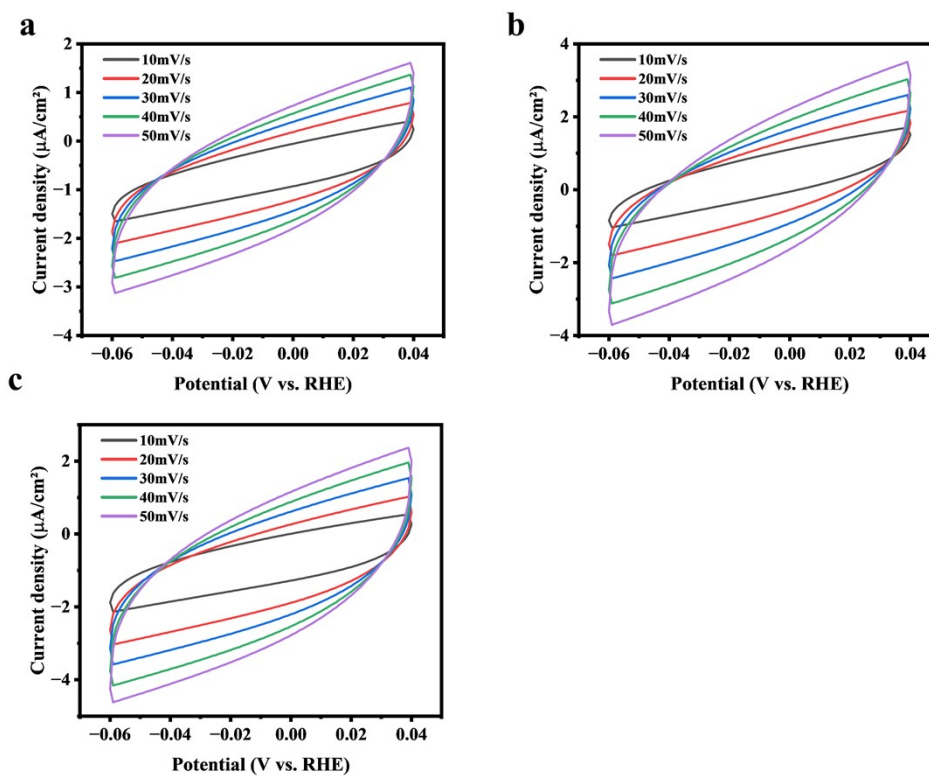

**Figure S18.** CV curves recorded for the (a) LCO, (b) LCCO, and (c) LSCO catalysts at various scanning rates (i.e., 10, 20, 30, 40, and 50  $\text{mV}\cdot\text{s}^{-1}$ ).

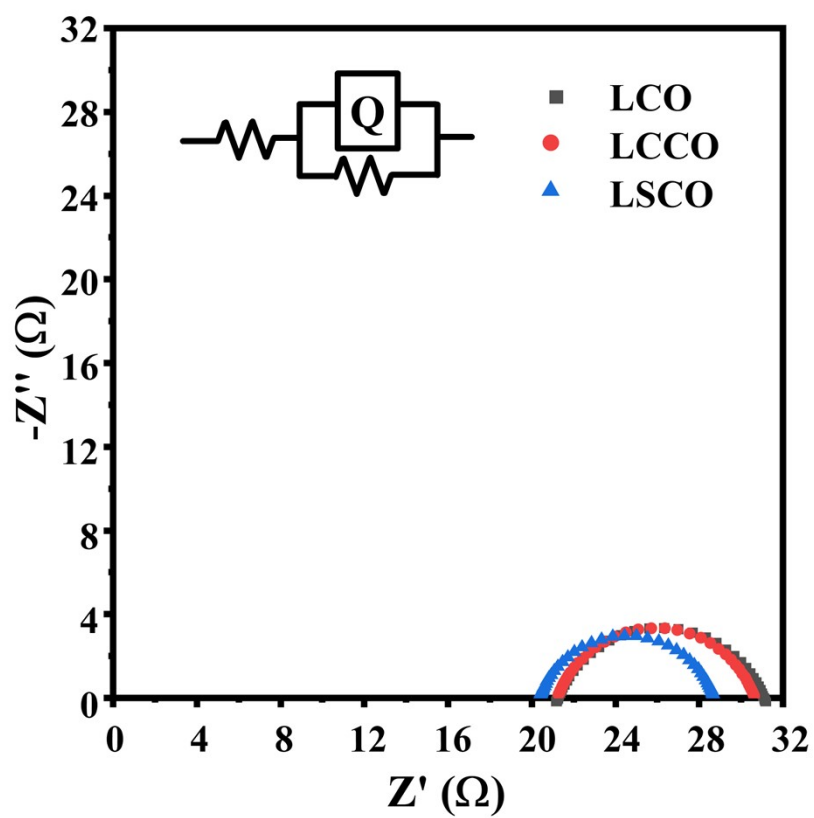

**Figure S19.** Nyquist plots of the LCO, LCCO, and LSCO catalysts.

**Table S1.** The atomic composition of LCO, LCCO, and LSCO by ICP-OES

| Sample | Weight fraction (%) |       |      |      | Atomic ratio (M/Cu) |    |       |       |
|--------|---------------------|-------|------|------|---------------------|----|-------|-------|
|        | La                  | Cu    | Ce   | Sr   | La/Cu               | Cu | Ce/Cu | Sr/Cu |
| LCO    | 63.05               | 14.70 |      |      | 1.96                | 1  |       |       |
| LCCO   | 55.61               | 14.43 | 4.95 |      | 1.78                | 1  | 0.16  |       |
| LSCO   | 55.87               | 14.08 |      | 4.24 | 1.82                | 1  |       | 0.21  |

**Table S2.** Refined parameters of the LCO, LCCO, and LSCO from Rietveld refinement analysis using the corresponding XRD data.

| Name | Space group | Lattice parameters |         |          |
|------|-------------|--------------------|---------|----------|
|      |             | a                  | b       | c        |
| LCO  | Fmmm        | 5.37258            | 5.4004  | 13.17735 |
| LCCO | Fmmm        | 5.34965            | 5.37294 | 13.21504 |
| LSCO | Fmmm        | 5.3556             | 5.4011  | 13.149   |

**Table S3.** Cu 2p XPS peak fitting parameters for LCO, LCCO, and LSCO

## LCO-Cu 2p

| Name                               | Peak position (eV) | FWHM | Peak area |
|------------------------------------|--------------------|------|-----------|
| Cu <sup>2+</sup> 2p <sub>3/2</sub> | 933.2              | 3.36 | 10953.86  |
| Cu <sup>2+</sup> 2p <sub>1/2</sub> | 953.0              | 3.36 | 5670.08   |

## LCCO-Cu 2p

| Name                               | Peak position (eV) | FWHM | Peak area |
|------------------------------------|--------------------|------|-----------|
| Cu <sup>+</sup> 2p <sub>3/2</sub>  | 932.6              | 1.95 | 6899.17   |
| Cu <sup>2+</sup> 2p <sub>3/2</sub> | 933.6              | 2.65 | 13565.67  |
| Cu <sup>+</sup> 2p <sub>1/2</sub>  | 952.4              | 2.96 | 7515.7    |
| Cu <sup>2+</sup> 2p <sub>1/2</sub> | 954.1              | 4.30 | 600.70    |

## LSCO-Cu 2p

| Name                               | Peak position (eV) | FWHM | Peak area |
|------------------------------------|--------------------|------|-----------|
| Cu <sup>+</sup> 2p <sub>3/2</sub>  | 932.8              | 2.60 | 4603.18   |
| Cu <sup>2+</sup> 2p <sub>3/2</sub> | 934.9              | 3.24 | 18583.83  |
| Cu <sup>+</sup> 2p <sub>1/2</sub>  | 953.5              | 2.60 | 2382.76   |
| Cu <sup>2+</sup> 2p <sub>1/2</sub> | 954.9              | 3.50 | 8620.62   |

**Table S4.** O 1s XPS peak fitting parameters for LCO, LCCO, and LSCO

## LCO-O 1s

| Name                            | Peak position (eV) | FWHM | Peak area |
|---------------------------------|--------------------|------|-----------|
| lattice O <sup>2-</sup>         | 529.2              | 1.69 | 2692.46   |
| Surface-adsorbed O <sub>2</sub> | 531.4              | 2.09 | 38863.4   |

|                                   |       |      |         |
|-----------------------------------|-------|------|---------|
| or hydroxyl groups                |       |      |         |
| Surface-adsorbed H <sub>2</sub> O | 533.1 | 1.24 | 8474.91 |

LCCO-O 1s

| Name                                               | Peak position (eV) | FWHM | Peak area |
|----------------------------------------------------|--------------------|------|-----------|
| lattice O <sup>2-</sup>                            | 528.7              | 1.69 | 25808.89  |
| O <sub>2</sub> <sup>2-</sup> /O <sup>-</sup>       | 530.7              | 1.54 | 13306.19  |
| Surface-adsorbed O <sub>2</sub> or hydroxyl groups | 531.5              | 1.53 | 28047.04  |
| Surface-adsorbed H <sub>2</sub> O                  | 532.6              | 1.90 | 5847.13   |

LSCO-O 1s

| Name                                               | Peak position (eV) | FWHM | Peak area |
|----------------------------------------------------|--------------------|------|-----------|
| lattice O <sup>2-</sup>                            | 528.8              | 1.59 | 14867.02  |
| O <sub>2</sub> <sup>2-</sup> /O <sup>-</sup>       | 530.5              | 1.32 | 6601.67   |
| Surface-adsorbed O <sub>2</sub> or hydroxyl groups | 531.5              | 1.67 | 35947.17  |
| Surface-adsorbed H <sub>2</sub> O                  | 532.8              | 1.73 | 5071.01   |

**Table S5.** Cu<sup>+</sup> ratio in LCO, LCCO, and LSCO calculated by XPS.

| Name | Cu <sup>+</sup> | Cu <sup>2+</sup> |
|------|-----------------|------------------|
| LCO  | 0               | 1                |
| LCCO | 0.336           | 0.664            |
| LSCO | 0.198           | 0.802            |
